# Supplementary material for: Circulating trimethylamine N‐oxide and the risk of cardiovascular diseases: a systematic review and meta‐analysis of 11 prospective cohort studies
Source: PubMed Central journal article supplement (PMC5742728; doi:10.1111/jcmm.13307), 2017-08-07
Supplement: JCMM-22-185-s001.pdf [file JCMM-22-185-s001.pdf]

## Supplement Materials

**Table S1.** Overview of multivariable relationships of TMAO with CVEs or Death.

| Outcome | Author          | Year | Adjusted HR (95% CI)                  | Adjusted Covariate                                                                                                                                                                                                                                |
|---------|-----------------|------|---------------------------------------|---------------------------------------------------------------------------------------------------------------------------------------------------------------------------------------------------------------------------------------------------|
| CVEs    | Tang, W. H.     | 2013 | 1.43 (1.05-1.94)                      | age, sex, smoking status, systolic blood pressure, low-density lipoprotein cholesterol level, high-density lipoprotein cholesterol level, status with respect to diabetes mellitus and log-transformed high-sensitivity C-reactive protein level. |
|         | Lever, M.       | 2014 | 2.00 (1.10-3.60)                      | eGFR                                                                                                                                                                                                                                              |
|         | Kaysen, G. A.   | 2015 | 0.92 (0.40-2.10)                      | race, diabetes, and prealbumin                                                                                                                                                                                                                    |
|         | Kim, R. B.      | 2015 | 1.23 (1.06-1.42)                      | age, sex, race and presence or absence of diabetes and cardiovascular comorbidities                                                                                                                                                               |
|         | Suzuki, T.      | 2016 | 1.09 (0.92-1.29)                      | age, blood urea and eGFR                                                                                                                                                                                                                          |
| Death   | Tang, W. H.     | 2013 | 3.37 (2.39-4.75)                      | age, sex, smoking status, systolic blood pressure, low-density lipoprotein cholesterol level, high-density lipoprotein cholesterol level, status with respect to diabetes mellitus and log-transformed high-sensitivity C-reactive protein level. |
|         | Lever, M.       | 2014 | 2.70 (1.60-4.80)                      | eGFR                                                                                                                                                                                                                                              |
|         | Kaysen, G. A.   | 2015 | 1.14 (0.67-1.93)                      | none                                                                                                                                                                                                                                              |
|         | Tang, W. H.     | 2015 | 1.45 (1.05-2.02)                      | traditional CVD risk factors, log-transformed hsCRP, log-transformed eGFR, hsCRP and cystatin C                                                                                                                                                   |
|         | Troiseid, M.    | 2015 | 1.35 (0.90-1.79)                      | eGFR, CRP and NT-proBNP                                                                                                                                                                                                                           |
|         | Ottiger, M.     | 2016 | 0.60 (0.20-1.60) and 1.90 (1.20-3.10) | comorbidities (coronary artery disease, congestive heart failure, cerebrovascular disease, peripheral artery occlusive disease, diabetes mellitus, chronic kidney disease, neoplastic disease, and chronic obstructive pulmonary disease)         |
|         | Skagen, K.      | 2016 | 1.38 (0.91-2.08)                      | age and eGFR                                                                                                                                                                                                                                      |
|         | Missailidis, C. | 2016 | 4.32 (1.32-14.2)                      | age, gender, SGA, albumin, DM and mGFR                                                                                                                                                                                                            |
|         | Suzuki, T.      | 2016 | 0.98 (0.80-1.21)                      | age, blood urea and eGFR                                                                                                                                                                                                                          |
|         | Suzuki, T.      | 2017 | 1.21 (0.98-1.48)                      | age, blood urea and eGFR                                                                                                                                                                                                                          |

eGFR= estimated glomerular filtration rate; CRP= C-reactive protein; NT-pro-BNP= amino-terminal pro-brain natriuretic peptide; ICED score= Index of Coexisting Disease Score; ESRD= end-stage renal disease

**Table S2.** Quality of Evidence evaluated by GRADE system

| Author          | Year | Design | Downgrade quality of evidence |               |              |              |                  | Upgrade quality of evidence |       |               | Quality of Evidence |
|-----------------|------|--------|-------------------------------|---------------|--------------|--------------|------------------|-----------------------------|-------|---------------|---------------------|
|                 |      |        | Risk of Bias                  | Inconsistency | Indirectness | Imprecision  | Publication Bias | Large effect                | PCWCE | Dose-response |                     |
| Tang, W. H.     | 2013 | PCS    | no                            | no            | no           | serious (-1) | undetected       | large (+1)                  | no    | no            | High ****           |
| Lever, M.       | 2014 | PCS    | no                            | serious (-1)  | no           | serious (-1) | undetected       | no                          | no    | no            | Low **□□            |
| Kaysen, G. A.   | 2015 | PCS    | no                            | serious (-1)  | serious (-1) | no           | undetected       | no                          | no    | no            | Low **□□            |
| Tang, W. H.     | 2015 | PCS    | no                            | no            | no           | serious (-1) | undetected       | large (+1)                  | no    | no            | High ****           |
| Troiseid, M.    | 2015 | PCS    | no                            | no            | no           | serious (-1) | undetected       | no                          | no    | no            | Moderate ***□       |
| Kim, R. B.      | 2015 | PCS    | no                            | serious (-1)  | no           | no           | undetected       | no                          | no    | no            | Moderate ***□       |
| Ottiger, M.     | 2016 | PCS    | no                            | serious (-1)  | no           | serious (-1) | undetected       | no                          | no    | no            | Low **□□            |
| Skagen, K.      | 2016 | PCS    | no                            | no            | no           | no           | undetected       | no                          | no    | no            | High ****           |
| Missailidis, C. | 2016 | PCS    | no                            | no            | no           | serious (-1) | undetected       | no                          | no    | no            | Moderate ***□       |
| Suzuki, T.      | 2016 | PCS    | no                            | serious (-1)  | no           | no           | undetected       | no                          | no    | no            | Moderate ***□       |
| Suzuki, T.      | 2017 | PCS    | no                            | serious (-1)  | no           | no           | undetected       | no                          | no    | no            | Moderate ***□       |

**Table S3.** Assessment of Newcastle-Ottawa Scale

| Author          | Year | Selection | Comparability | Outcome | Total |
|-----------------|------|-----------|---------------|---------|-------|
| Tang, W. H.     | 2013 | 4         | 2             | 2       | 8     |
| Lever, M.       | 2014 | 3         | 1             | 1       | 5     |
| Kaysen, G. A.   | 2015 | 2         | 1             | 2       | 5     |
| Tang, W. H.     | 2015 | 4         | 2             | 2       | 8     |
| Troiseid, M.    | 2015 | 3         | 1             | 2       | 6     |
| Kim, R. B.      | 2015 | 2         | 1             | 2       | 5     |
| Ottiger, M.     | 2016 | 3         | 1             | 1       | 5     |
| Skagen, K.      | 2016 | 4         | 1             | 2       | 7     |
| Missailidis, C. | 2016 | 3         | 2             | 1       | 6     |
| Suzuki, T.      | 2016 | 3         | 1             | 1       | 5     |
| Suzuki, T.      | 2017 | 3         | 1             | 1       | 5     |

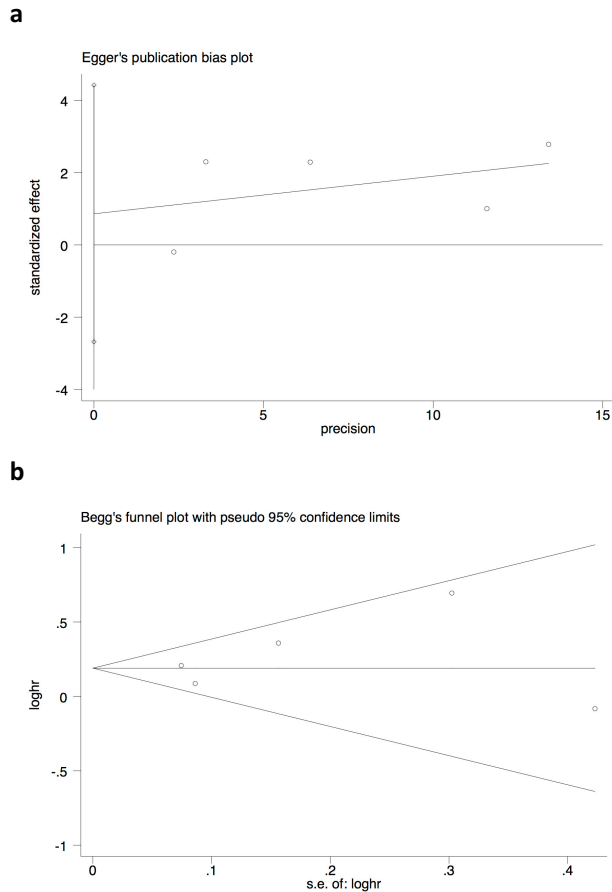

**Fig. S1.** Egger linear regression test and Begg's test plot with 95% Cis for the relationship between TMAO level and CVEs

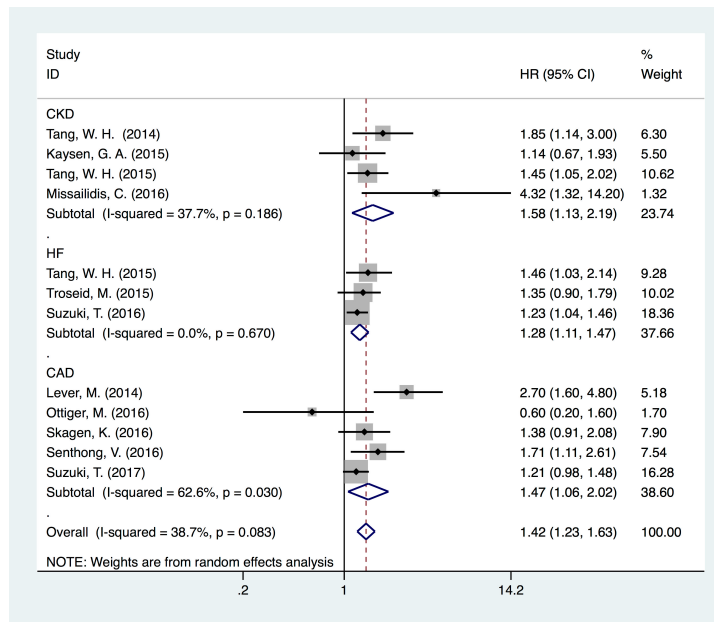

**Fig. S2.** Forest plot (random-effects model) for the association between TMAO (lowest vs. highest category) and CVD risk in different populations.

**a**

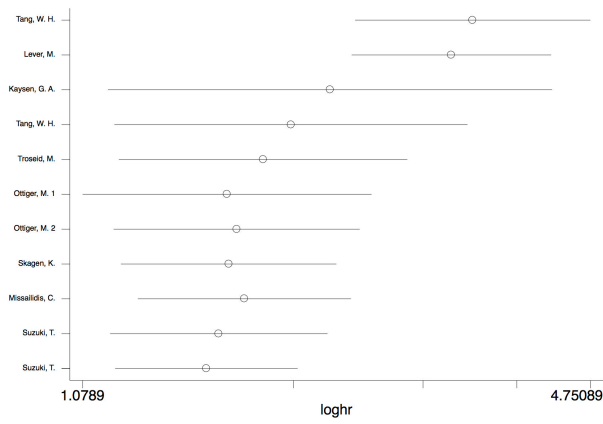

**b**

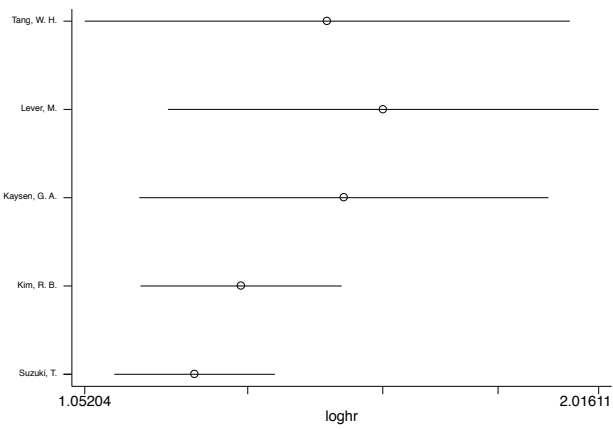

**Fig. S3.** Cumulative analysis for baseline TMAO level and death **(a)** and CVEs **(b)**.

**a**

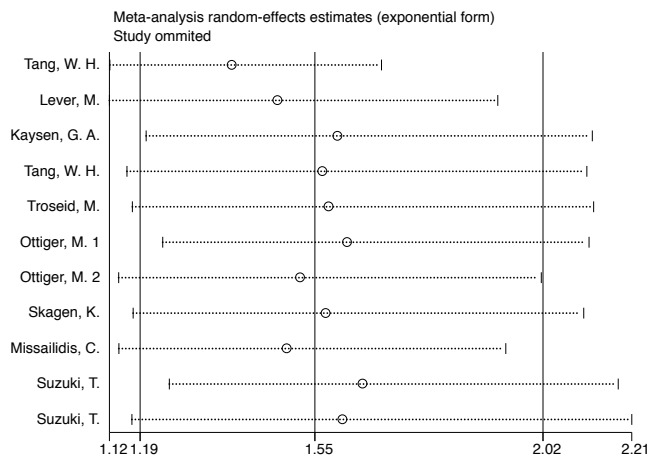

**b**

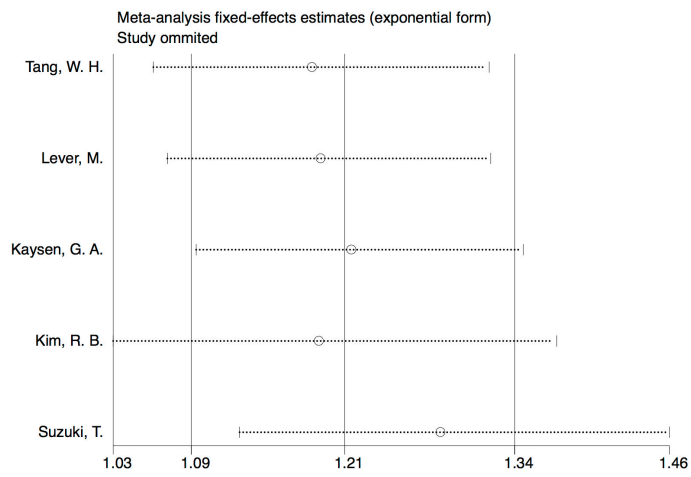

**Fig. S4.** Sensitivity analysis for TMAO level and death **(a)** and CVEs **(b)**.

**a**

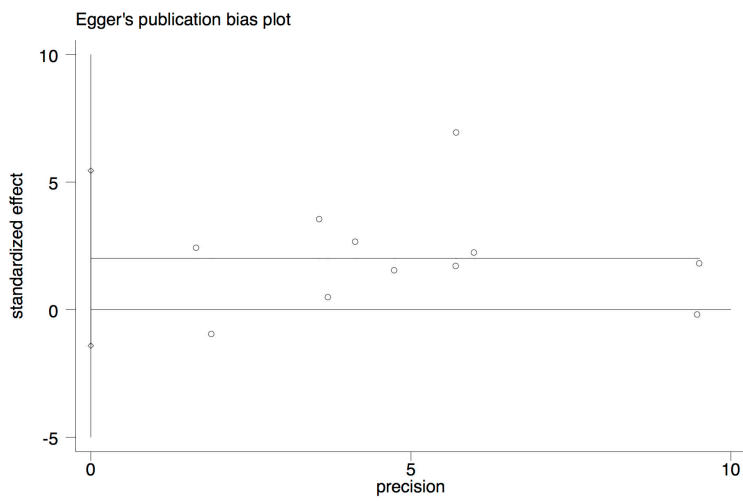

**b**

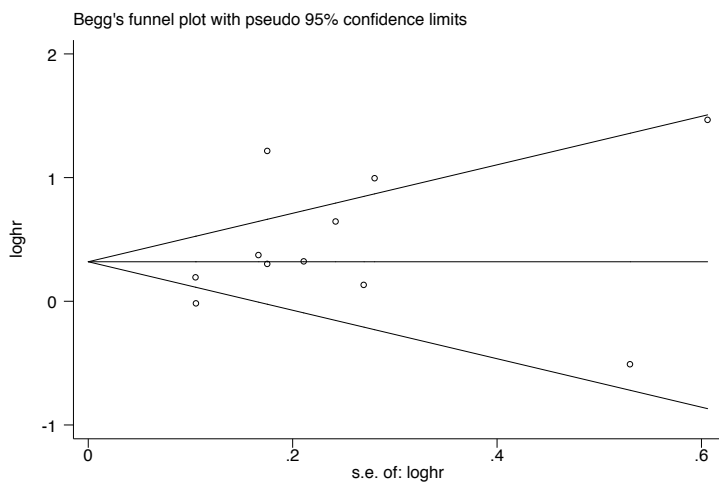

**Fig. S5.** Egger linear regression test and Begg’s test plot with 95% Cis for the relationship between baseline TMAO level and death risk.

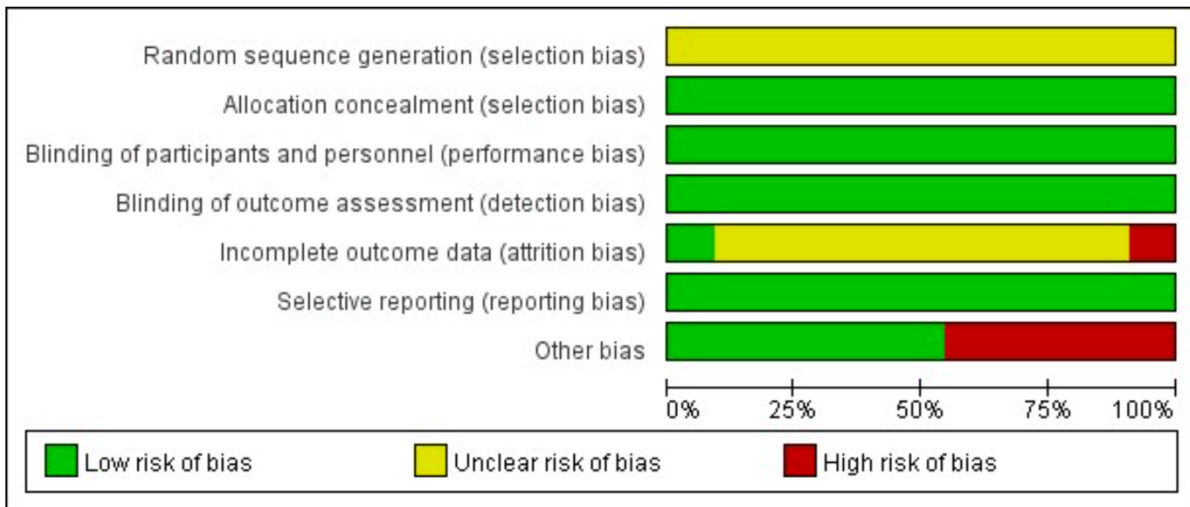

**Fig. S6a.** Risk of bias graph: review authors' judgements about each risk of bias item presented as percentages across all included studies.

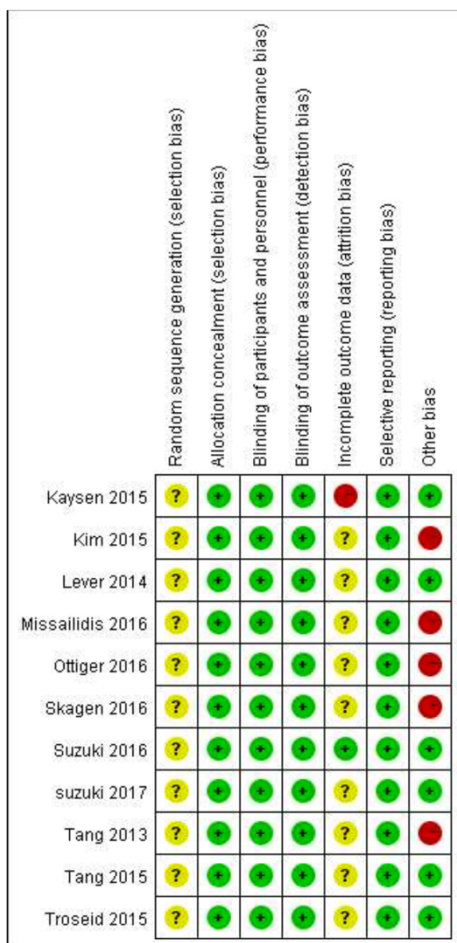

**Fig. S6b.** Risk of bias summary: review authors' judgements about each risk of bias item for each included study.
